# Supplementary material
Source: Springer Nature journal article supplement (https://www.springermedizin.de/resource/supplementary/13002_2008_139_MOESM2_ESM.pdf/9627336)

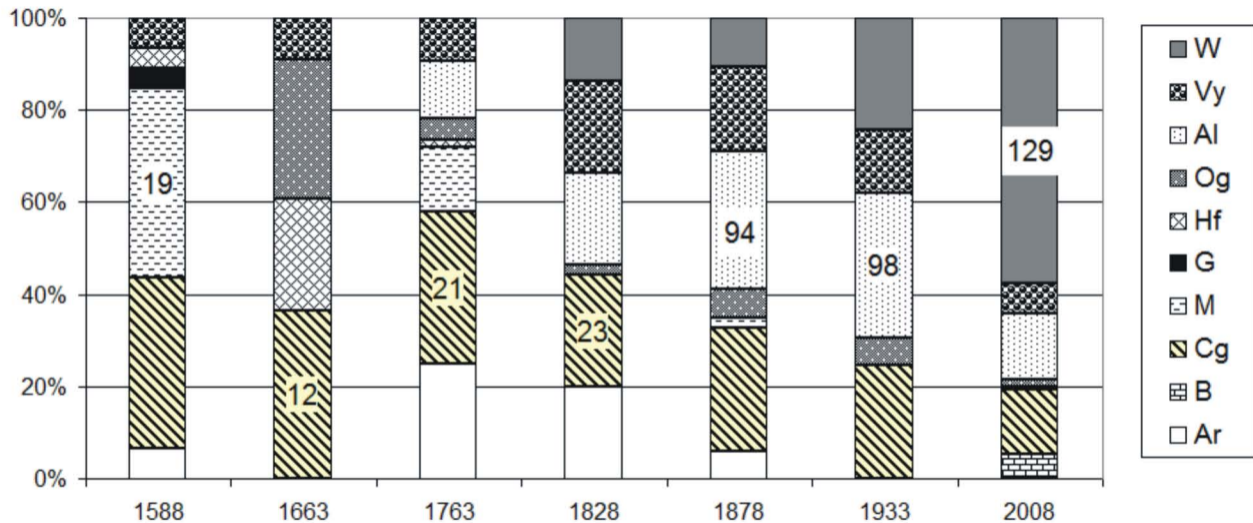

Supplement: MOESM2 [file 9627336]
